# Supplementary material
Source: PubMed Central journal article supplement (PMC7191000)
Supplement: jci-130-131800-s463.pdf [file jci-130-131800-s463.pdf]

## **Supplemental data**

Supplemental Figures 1-9

Supplemental Videos 1-4

Supplemental Tables 1-4

Supplemental Methods

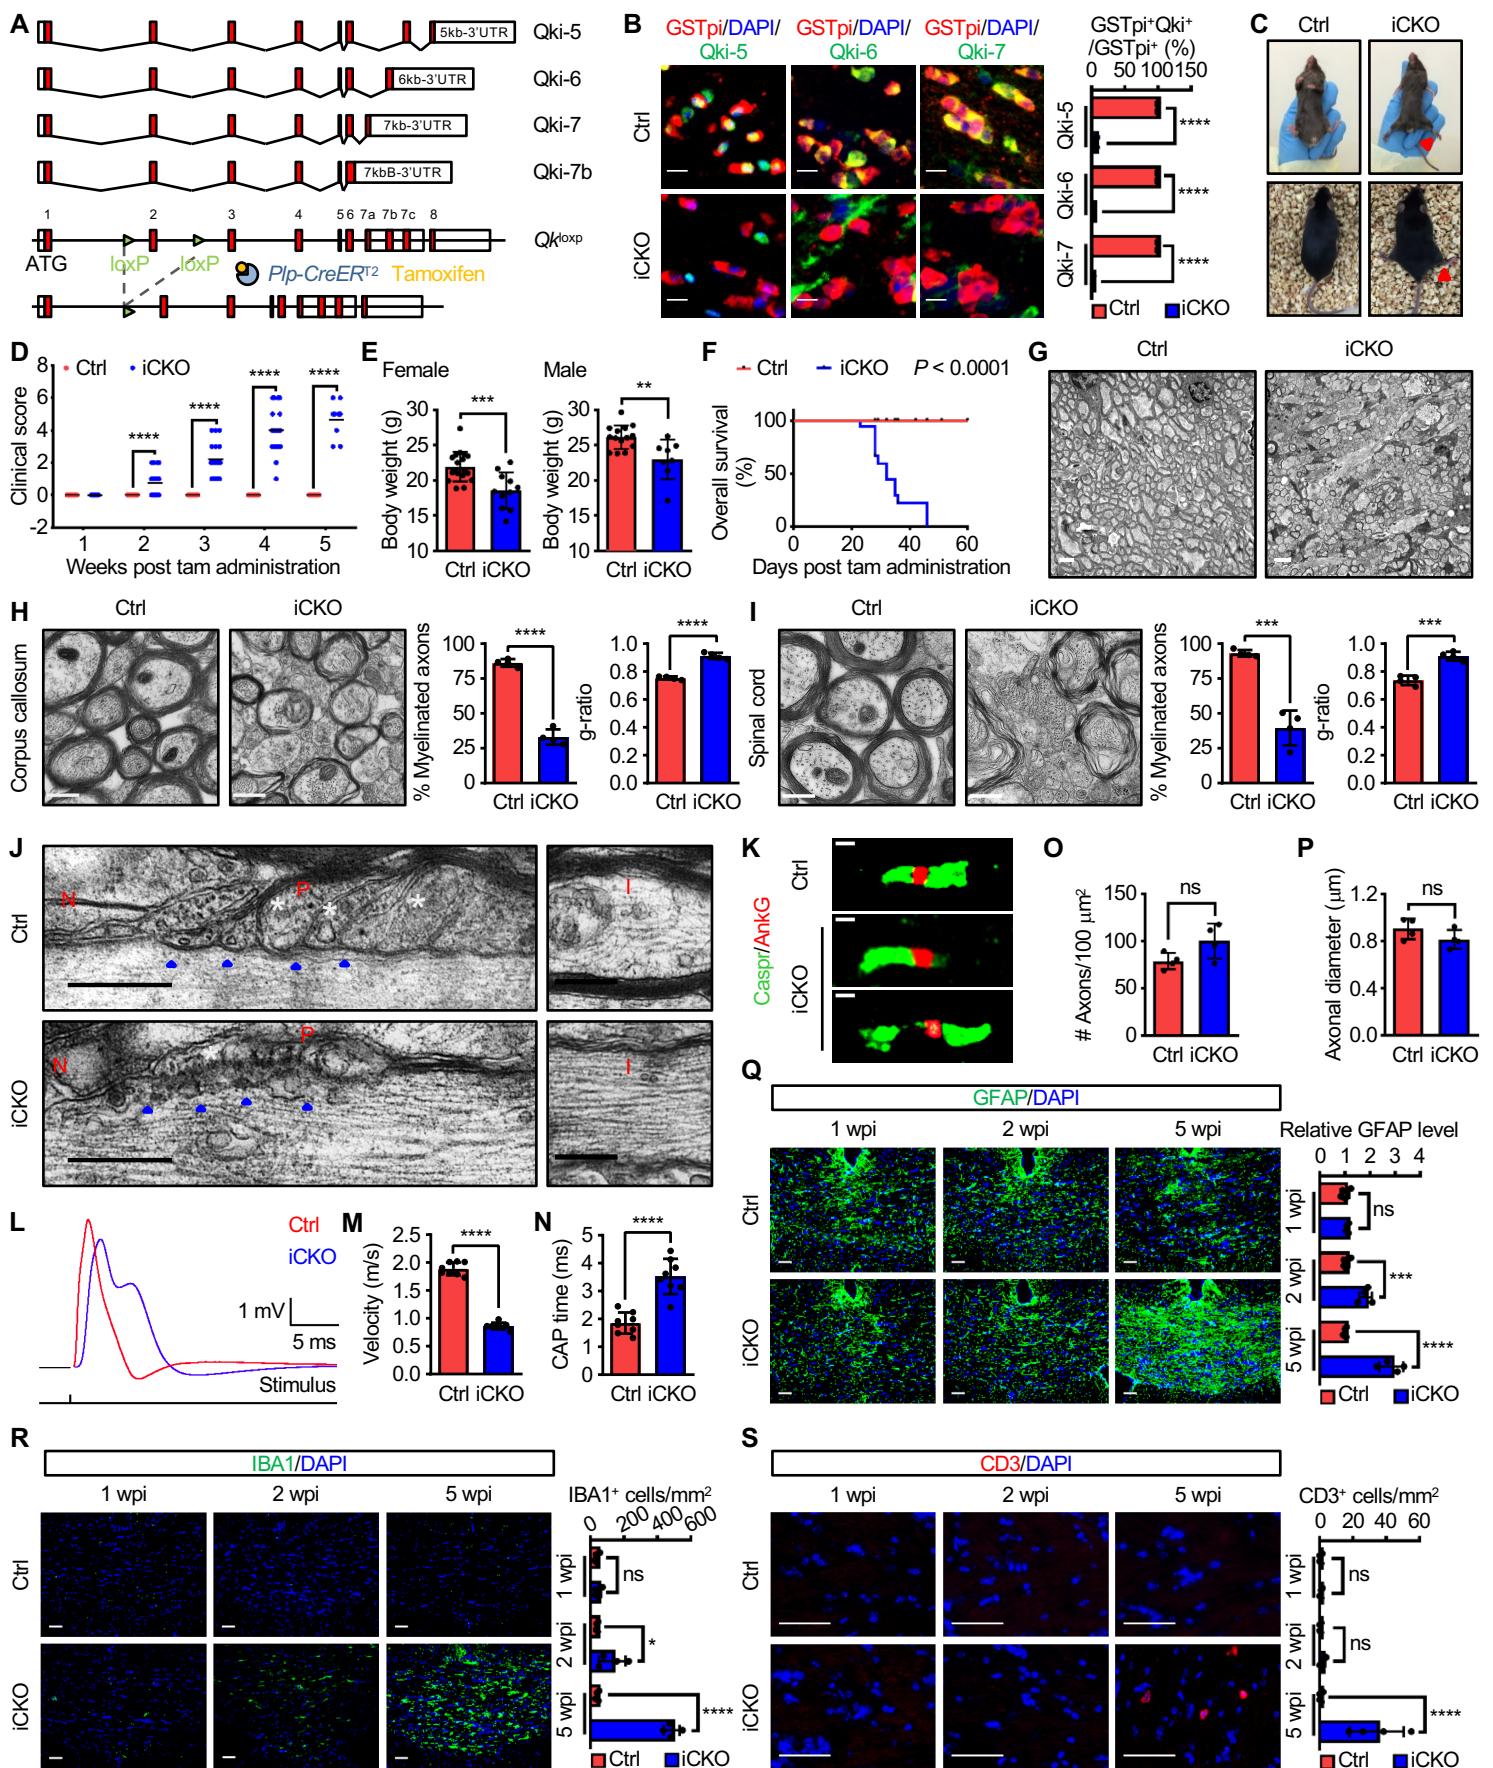

**Supplemental Figure 1. *Qki* is essential for maintaining myelin integrity.** (A) Schema depicting the splicing isoforms of *Qki* gene and the generation of oligodendrocyte-specific *Qki*-iCKO mice. 3' UTR, 3' untranslated region. (B) Representative images and quantification of immunofluorescent staining of GSTpi-Qki-5, GSTpi-Qki-6, and GSTpi-Qki-7 in the corpus callosum tissues of *Qki*-iCKO mice and controls 5 wpi ( $n = 4$  mice/group). Scale bars, 10  $\mu$ m. (C) Representative images showing the severe hind limb weakness and paresis of *Qki*-iCKO mice 4 wpi. (D) The clinical scores of *Qki*-iCKO mice ( $n = 18$ ) and controls

( $n = 34$ ) are shown. Tam, tamoxifen. **(E)** Body weights of *Qk*-iCKO mice and controls 4 wpi ( $n = 18$  female mice and  $n = 14$  male mice in the control group.  $n = 11$  female mice and  $n = 8$  male mice in the *Qk*-iCKO group). **(F)** The Kaplan-Meier overall survival curves (log-rank test) of *Qk*-iCKO mice ( $n = 18$ ) and controls ( $n = 34$ ) are shown. **(G-I)** Representative electron micrographs of cross sections of the optic nerves **(G)**, corpus callosum tissues **(H)**, and spinal cords **(I)** of *Qk*-iCKO mice and controls 5 wpi ( $n = 4$  mice/group). Scale bars, 2  $\mu\text{m}$  **(G)**; 500 nm **(H and I)**. **(J)** Representative electron micrographs of longitudinal sections of the optic nerves from *Qk*-iCKO mice and controls 5 wpi. The node (N), paranode (P, \*), internode (I), and axoglial junction (arrowhead) are indicated. Scale bars, 500 nm. **(K)** Representative images of immunofluorescent staining of Caspr and AnkG in the optic nerves of *Qk*-iCKO mice and controls 5 wpi. Scale bars, 1  $\mu\text{m}$ . **(L-N)** Representative CAP traces **(L)** and quantification of conduction velocities **(M)** and CAP time **(N)** recorded from *Qk*-iCKO mice and controls 5 wpi.  $n = 4$  mice/group,  $n = 8$  optic nerves/group. **(O and P)** Quantification of axon density **(O)** and axonal diameter **(P)** in the experimental mice in **G** ( $n = 4$  mice/group). **(Q-S)** Representative images and quantification of immunofluorescent staining of GFAP **(Q)**, IBA1 **(R)**, and CD3 **(S)** in the corpus callosum tissues of *Qk*-iCKO mice and controls 1, 2, and 5 wpi ( $n = 4$  mice/group). Scale bars, 50  $\mu\text{m}$ . Data are mean  $\pm$  s.d.; student's *t* test **(B, E, H, I, and M-P)**; two-way ANOVA with Holm-Sidak's multiple comparisons test **(D and Q-S)**. \* $P < 0.05$ ; \*\* $P < 0.01$ ; \*\*\* $P < 0.001$ ; \*\*\*\* $P < 0.0001$ ; ns, not significant.

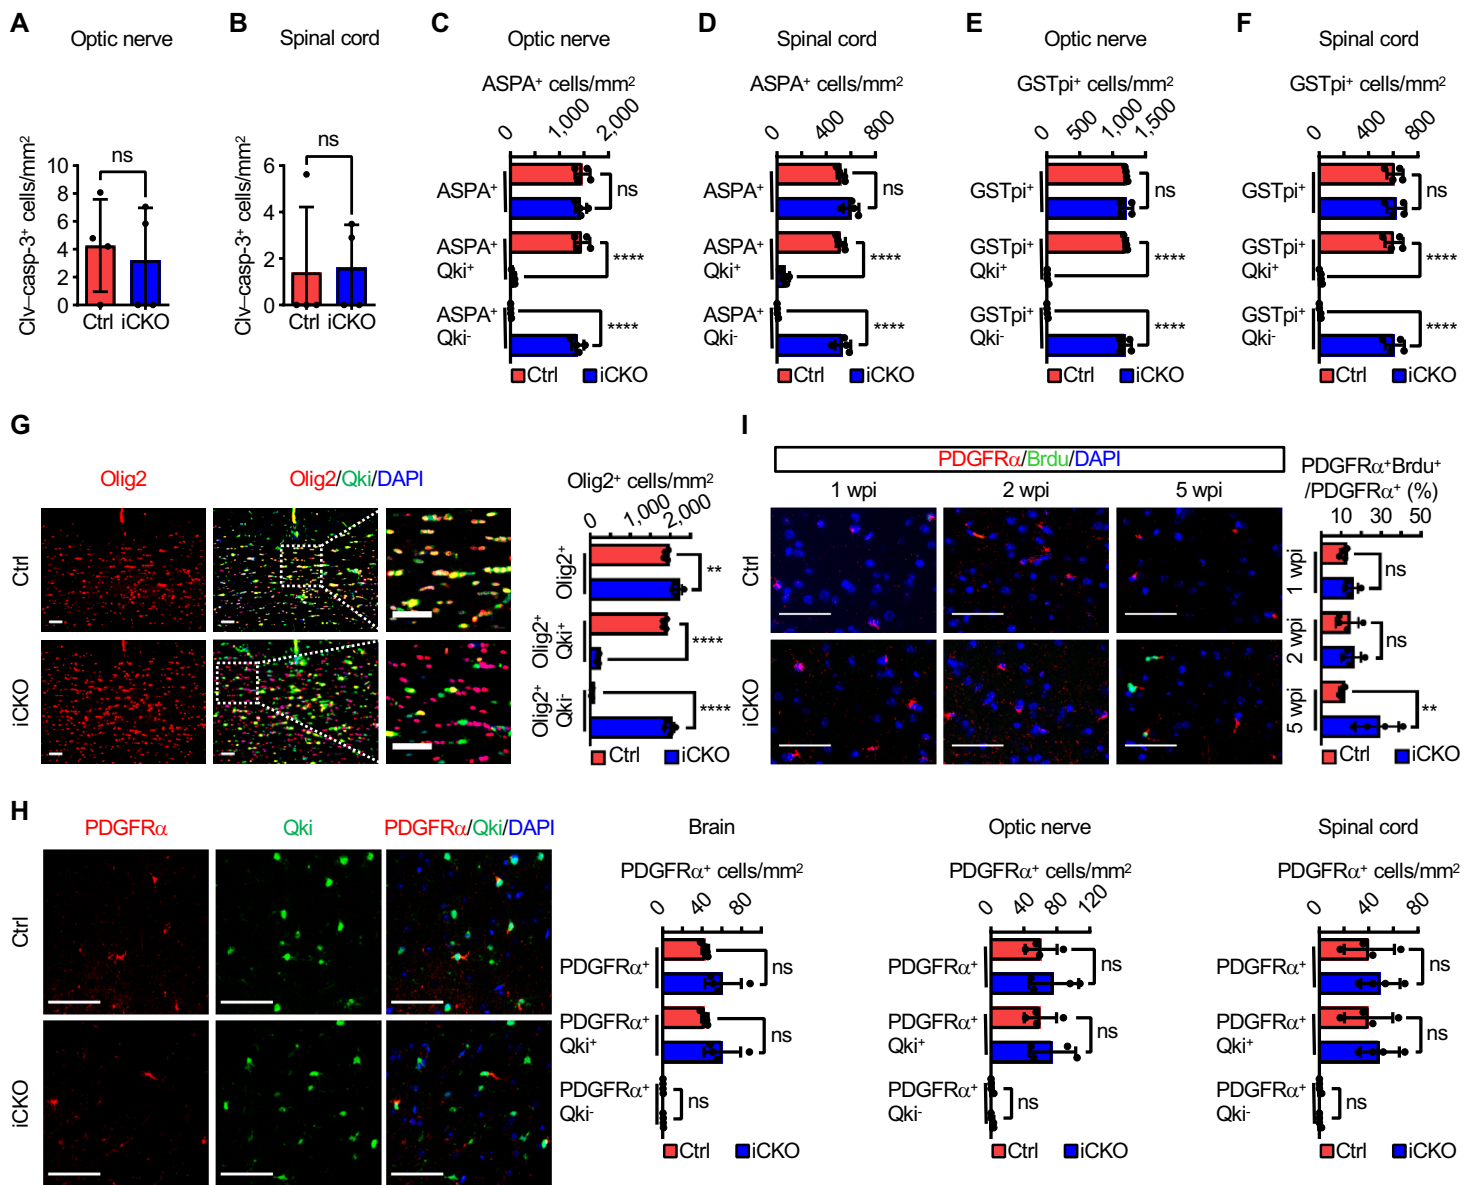

**Supplemental Figure 2. Qki regulates myelin homeostasis independently of oligodendrocyte death. (A and B)**

Quantification of dead cells by immunofluorescent staining of Clv-casp-3 in the optic nerves and spinal cords of *Qk*-iCKO mice and controls 5 weeks after tamoxifen injection ( $n = 4$  mice/group). (C-F) Quantification of immunofluorescent staining of ASPA-Qki and GSTpi-Qki in the optic nerves and spinal cords of *Qk*-iCKO mice and controls 5 weeks after tamoxifen injection ( $n = 4$  mice/group). (G) Representative images and quantification of immunofluorescent staining of Olig2 and Qki in the corpus callosum tissues of *Qk*-iCKO mice and controls 5 weeks after tamoxifen injection ( $n = 4$  mice/group). Scale bars, 50  $\mu$ m. (H) Representative images and quantification of immunofluorescent staining of PDGFR $\alpha$  and Qki in the brains, optic nerves, and spinal cords of *Qk*-iCKO mice and controls 5 weeks after tamoxifen injection ( $n = 4$  mice/group). Scale bars, 50  $\mu$ m. (I) Representative images and quantification of immunofluorescent staining of PDGFR $\alpha$  and Brdu in the brains of *Qk*-iCKO mice and controls 1, 2, and 5 wpi ( $n = 4$  mice/group). Scale bars, 50  $\mu$ m. Data are mean  $\pm$  s.d.; student's *t* test (A and B); one-way ANOVA followed by Bonferroni's post hoc test (C-I). \*\* $P < 0.01$ ; \*\*\*\* $P < 0.0001$ ; ns, not significant.



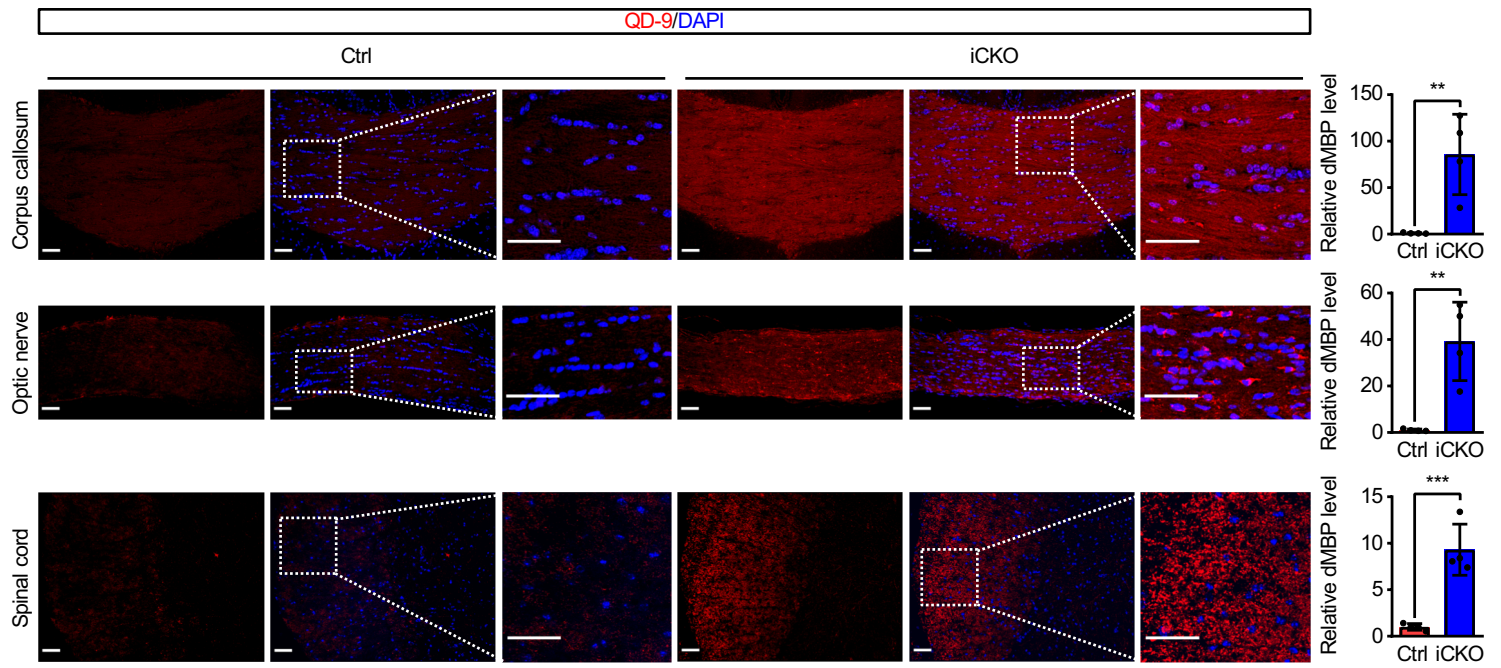

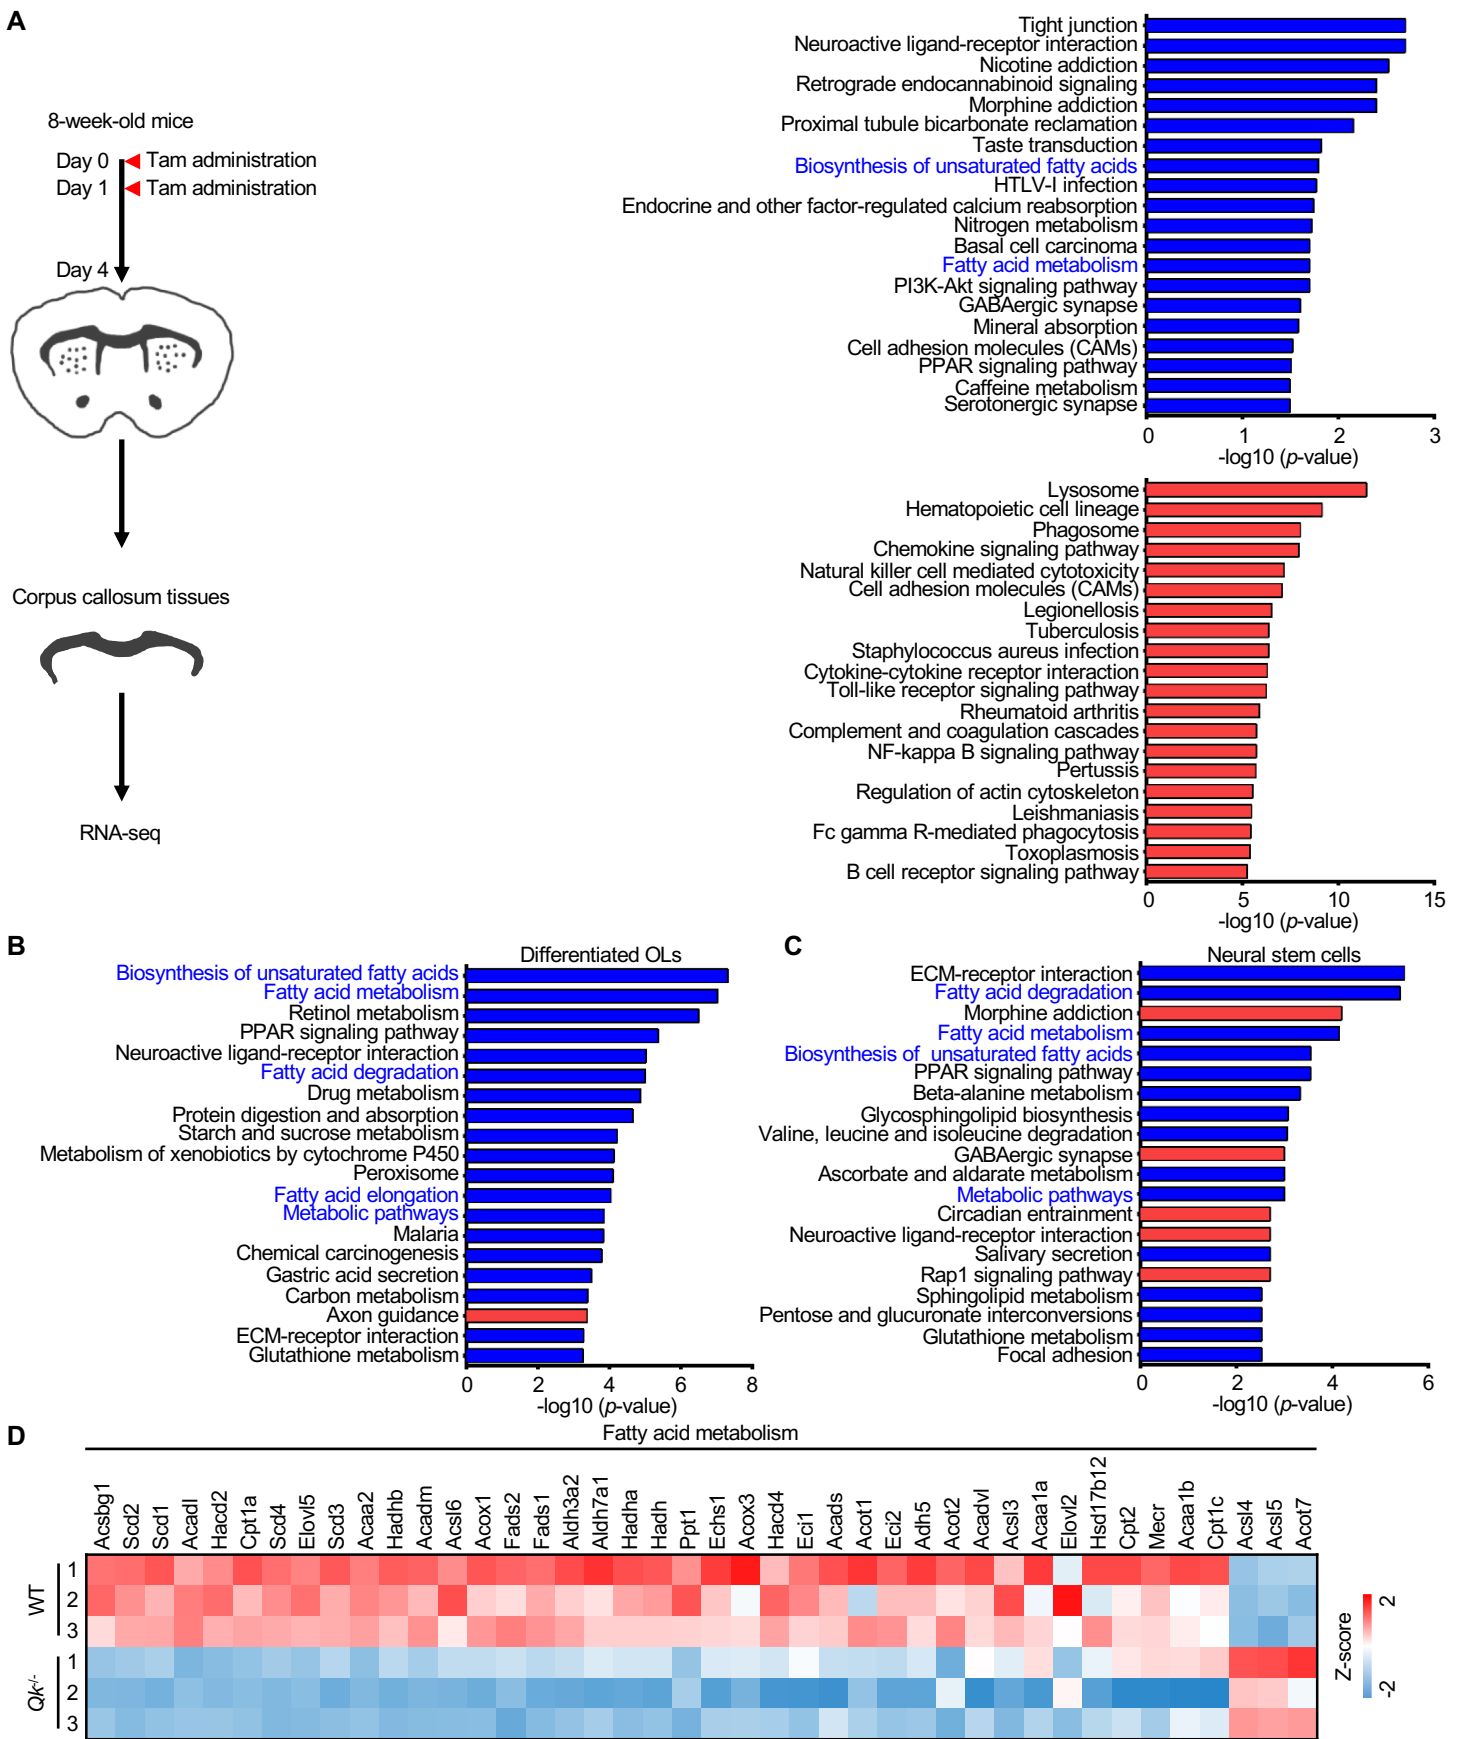

**Supplemental Figure 4. Transcriptional regulation of genes involved in fatty acid desaturation and elongation by Qki.** (A) Schema depicting the workflow for sample collection and RNA sequencing in the corpus callosum tissues of *Qki*-iCKO mice and controls (left).  $n = 4$  mice/group. The top 20 enriched pathways are shown as bar graphs (right). (B) Bar graph showing the top 20 enriched pathways in WT and *Qki*-depleted differentiated oligodendrocytes ( $n = 3$  cell lines/group). (C) Bar graph showing the top 20 enriched pathways in WT and *Qki*-depleted NSCs ( $n = 4$  cell lines/group). Blue and red represent pathways whose activities were decreased or increased, respectively. (D) Heat map representing the differentially expressed genes involved in fatty acid metabolism in differentiated oligodendrocytes.

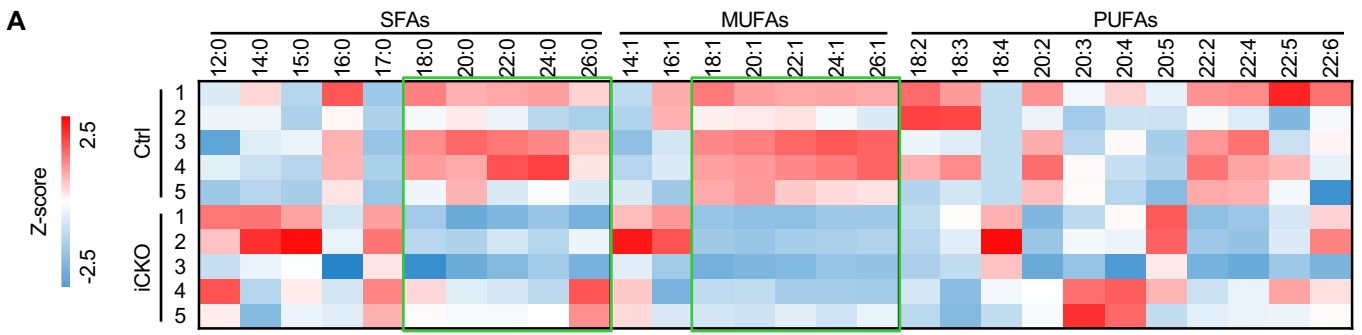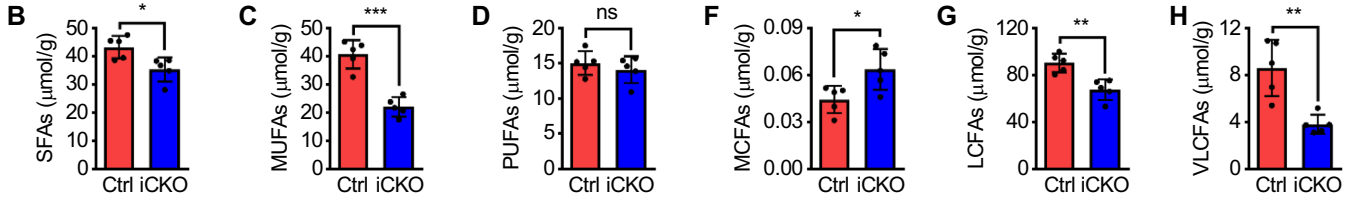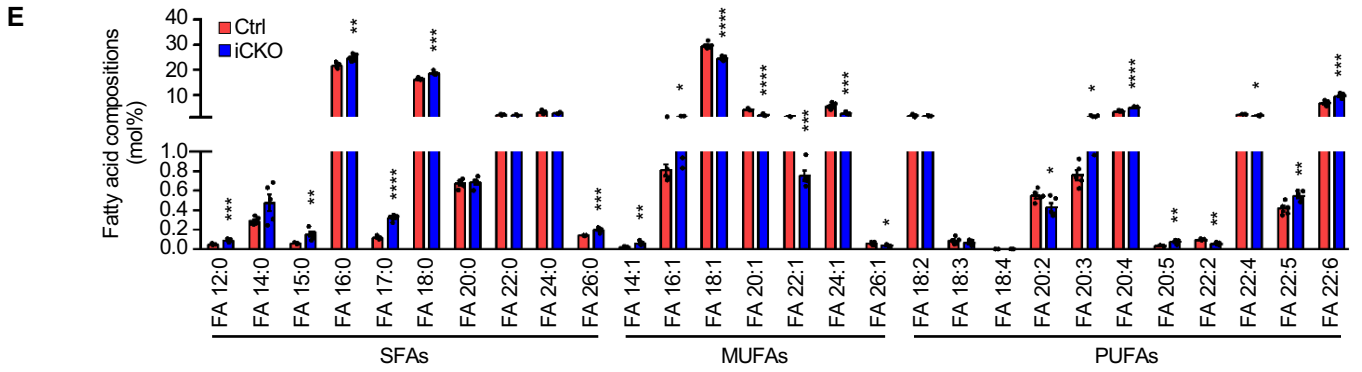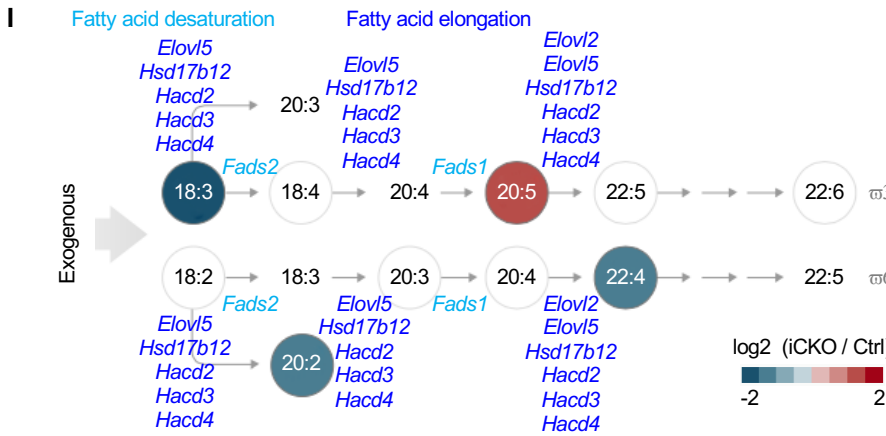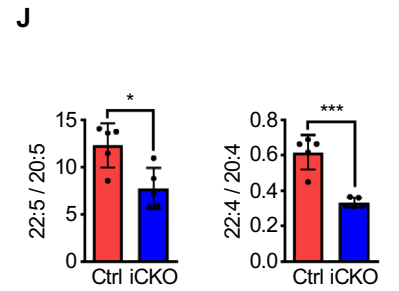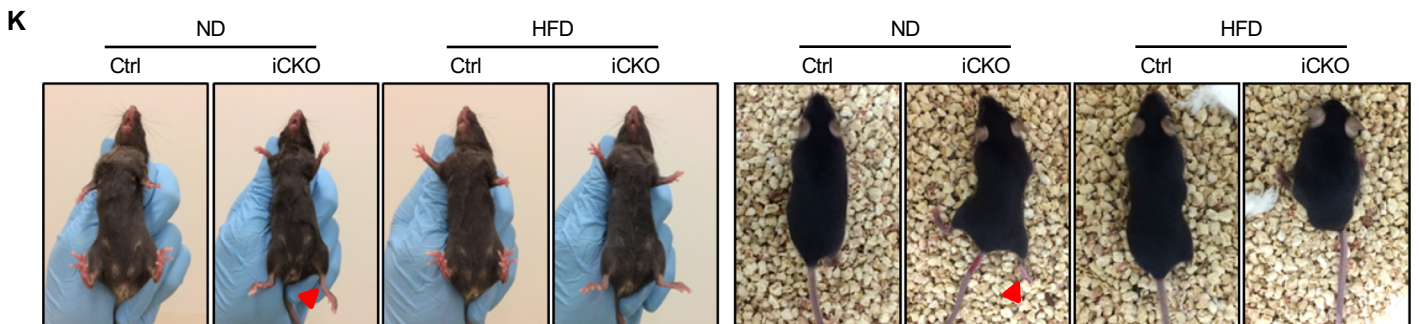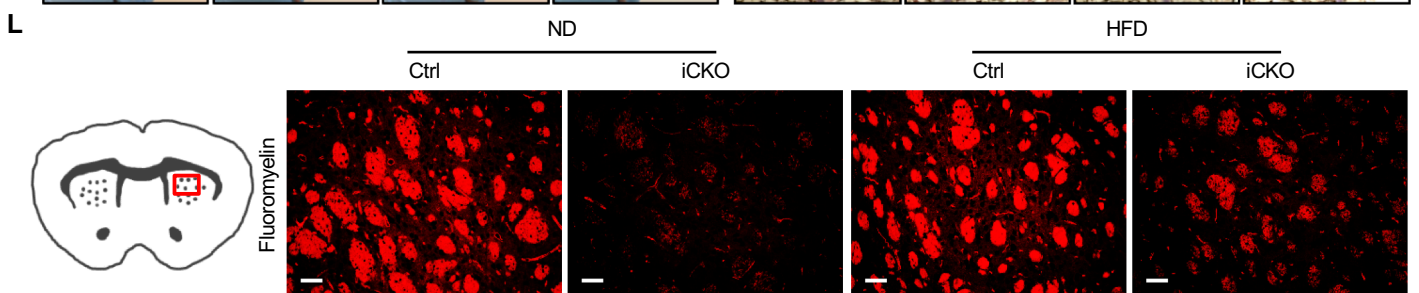

**Supplemental Figure 5. Disturbed fatty acid desaturation and elongation by depletion of Qki in mature oligodendrocytes.** (A) Heat map plotting the differences in the concentrations of each fatty acid species as measured by mass spectrometry in the spinal cords of *Qk-iCKO* mice and controls 5 weeks after tamoxifen injection ( $n = 5$  mice/group). The green boxes highlight the saturated and monounsaturated LCFAs and VLCFAs. (B-D) Quantification of the concentrations of SFAs (B), MUFAs (C), and PUFAs (D) in the samples in A ( $n = 5$  mice/group). (E) Quantification of the compositions of fatty acids in the samples in A ( $n = 5$  mice/group). (F-H) Quantification of the concentrations of MCFAs (F), LCFAs (G), and VLCFAs (H) in the samples in A ( $n = 5$  mice/group). (I) Schema showing the desaturating and elongating reactions of the PUFAs with the reduction or accumulation of specific fatty acid molecules (from lipidomic data shown in A) and the downregulated corresponding enzymes (from RNA-seq data shown in Figure 3D) in *Qk-iCKO* mice relative to controls. The reduction in fatty acid desaturases is shown in light blue, and the reduction in enzymes of the fatty acid elongation cycle is shown in dark blue. The scale factor indicates a log<sub>2</sub>-fold change in the fatty acid concentration between *Qk-iCKO* mice and controls. (J) Quantification of the product/substrate ratios of representative fatty acid-elongating reactions in the samples in A ( $n = 5$  mice/group). (K) Representative images showing the severe abnormal hind limb weakness (second panel from the left, red arrow) and paresis (sixth panel from the left, red arrow) of *Qk-iCKO* mice fed an ND or HFD for 5 weeks after tamoxifen injection. (L) Representative images of staining of FluoroMyelin in the caudoputamen tissues of the experimental mice in K. Images were taken from the regions of the red-boxed areas in the schema (left panel). Scale bars, 50  $\mu\text{m}$ . Data are mean  $\pm$  s.d.; student's *t* test. \* $P < 0.05$ ; \*\* $P < 0.01$ ; \*\*\* $P < 0.001$ ; \*\*\*\* $P < 0.0001$ ; ns, not significant.

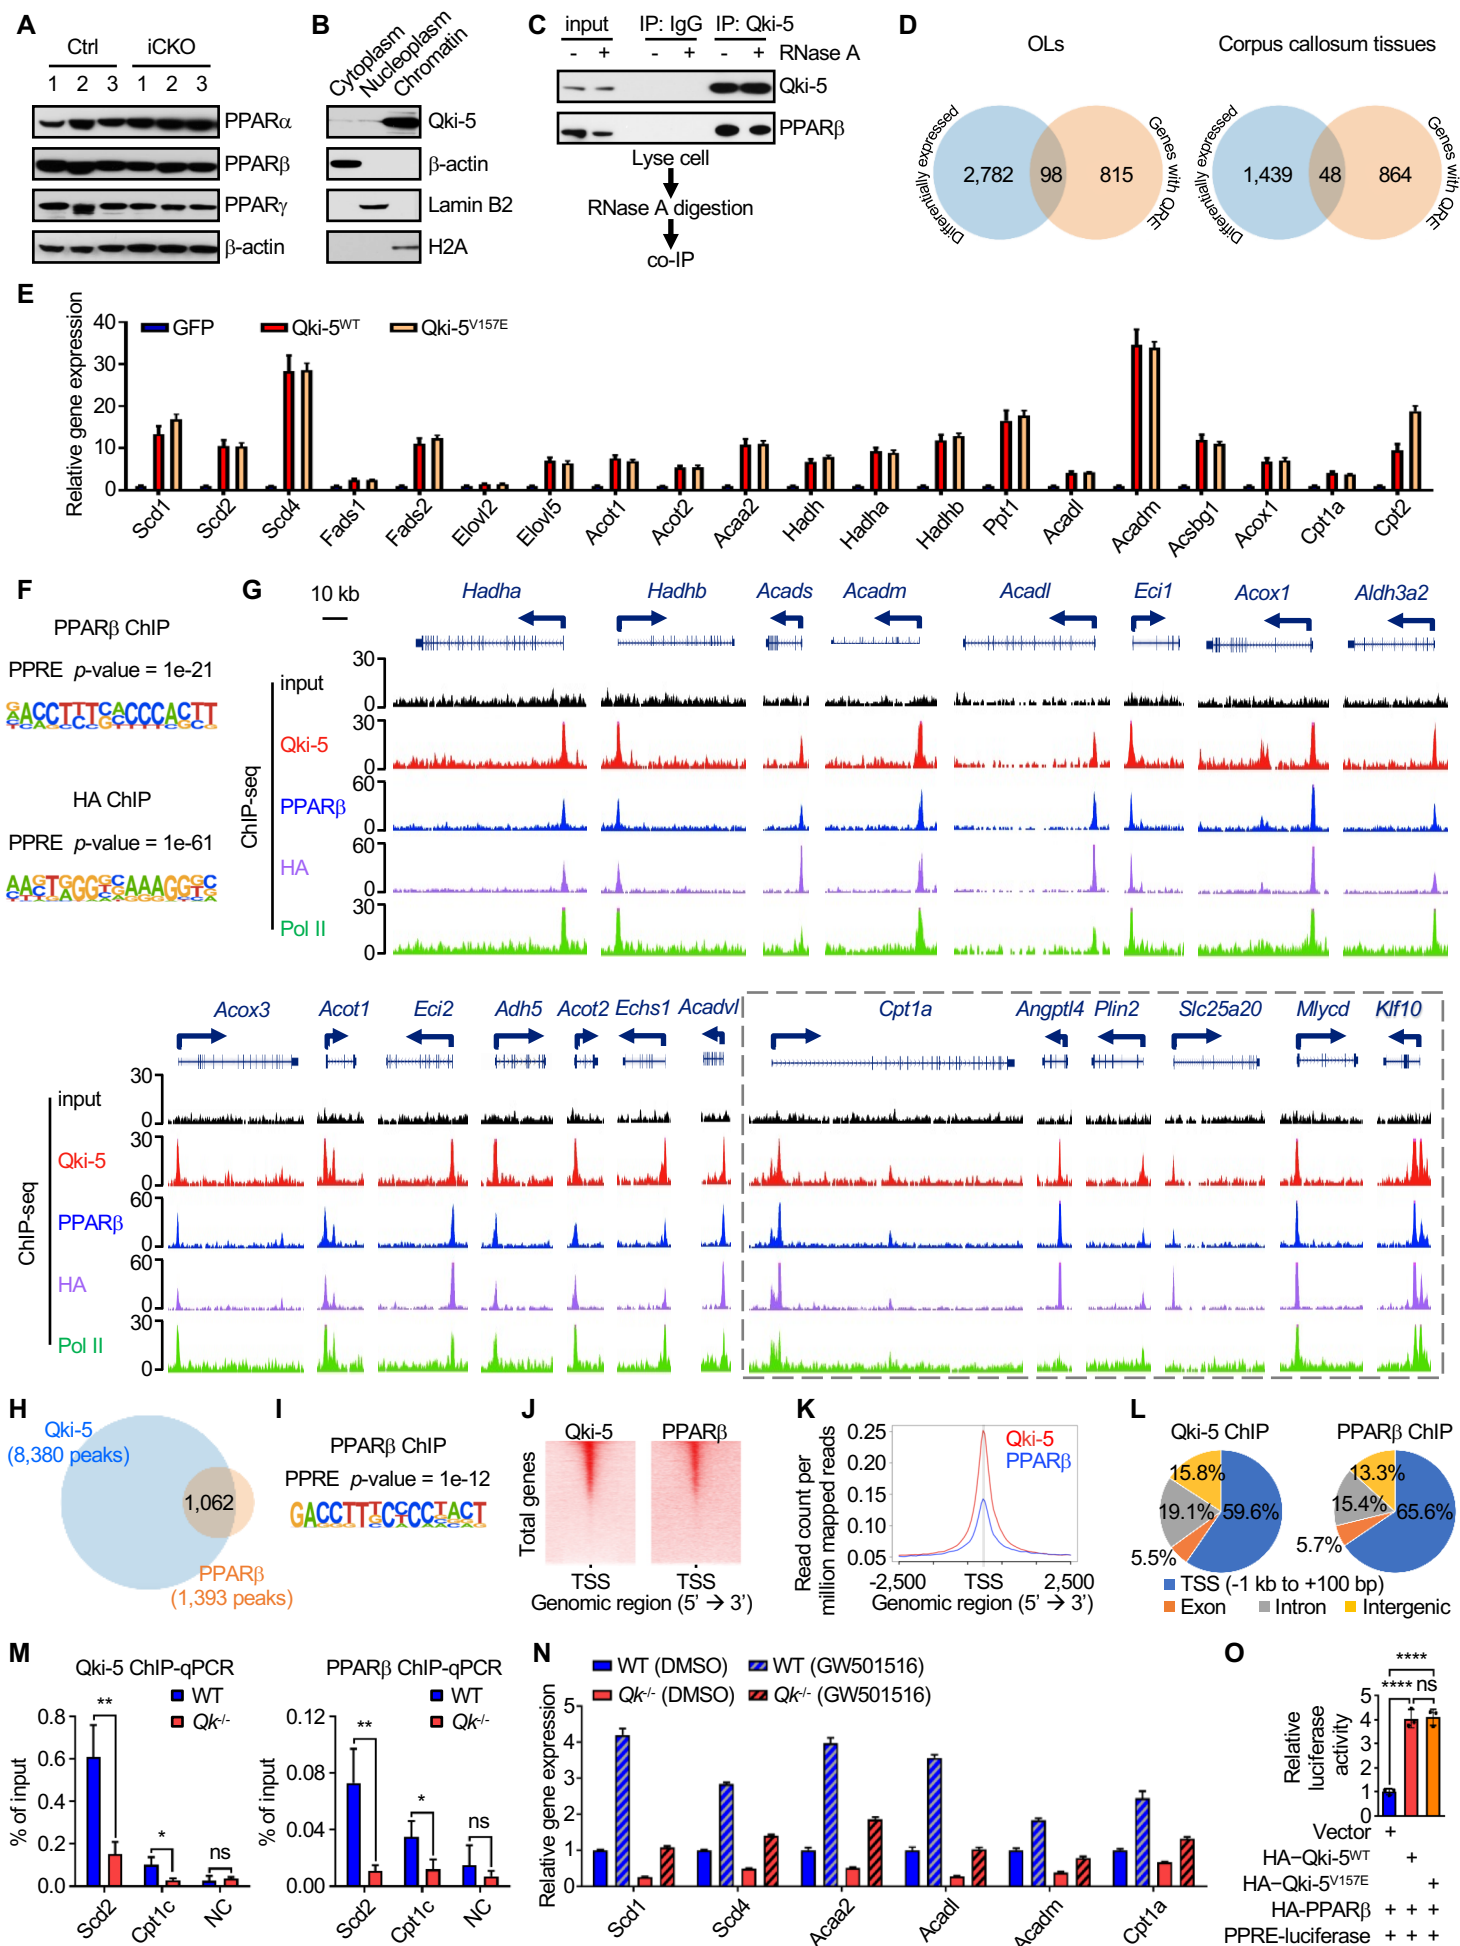



**Supplemental Figure 6. Qki-5 interacts with PPAR $\beta$  to regulate the transcription of genes involved in fatty acid metabolism.** (A) Immunoblots showing the expression of all homologs of PPAR in the corpus callosum tissues of *Qki-iCKO* mice and controls 5 weeks after tamoxifen injection. (B) Immunoblots showing the expression of Qki-5 in the subcellular fractions of differentiated oligodendrocytes. (C) Co-IP of Qki-5 and PPAR $\beta$  in differentiated oligodendrocytes in which the cell lysate was treated with RNase A. (D) Venn diagram depicting the overlap between the differentially expressed genes (*Qki-iCKO* group versus the control group) and genes with QRE in freshly isolated mouse oligodendrocytes (left) and adult corpus callosum tissues (right). (E) RT-qPCR evaluation of the expression levels of genes involved in fatty acid metabolism in *Qki*<sup>-/-</sup> cells with ectopically expressed Qki-5<sup>WT</sup>, Qki-5<sup>V157E</sup>, or GFP. (F) Significant enrichment of PPRE motifs in PPAR $\beta$ - and HA-binding events from differentiated oligodendrocytes with ectopic expression of HA-PPAR $\beta$ . (G) Representative ChIP-seq binding peaks of Qki-5, PPAR $\beta$ , HA, and Pol II on gene loci associated with fatty acid metabolism. The ChIP-seq peaks on six known PPAR $\beta$  target genes are indicated in dotted box. (H) Overlap of ChIP-seq peak sets of Qki-5 and PPAR $\beta$  in freshly isolated mouse oligodendrocytes. (I) Significant enrichment of PPRE motif in PPAR $\beta$ -binding events from freshly isolated mouse oligodendrocytes. (J) ChIP-seq density heat maps of Qki-5 and PPAR $\beta$  within  $\pm$  1 kb of the TSS in freshly isolated mouse oligodendrocytes. All peaks are rank ordered from high to low Qki-5 occupancy. (K) Average genome-wide occupancies of Qki-5 and PPAR $\beta$  within  $\pm$  2.5 kb of the TSS in freshly isolated mouse oligodendrocytes. (L) Genomic global distribution of the ChIP-seq peaks of Qki-5 and PPAR $\beta$  in freshly isolated mouse oligodendrocytes. (M) ChIP-qPCR showing the recruitment of Qki-5 and PPAR $\beta$  to chromatin in WT and *Qki*<sup>-/-</sup> differentiated oligodendrocytes. NC, negative control. (N) RT-qPCR showing the transcriptional levels of representative genes involved in fatty acid metabolism in WT and *Qki*<sup>-/-</sup> differentiated oligodendrocytes treated with 100 nM GW501516 or vehicle (DMSO) for 48 hours. (O) Bar graph showing the expression of PPAR-responsive luciferase reporter in HEK293T cells with ectopically expressed Qki-5 (WT or V157E mutant) or empty vector. Data are representative of 3 independent experiments (A-C, E, and M-O). Data are mean  $\pm$  s.d.; student's *t* test (M); one-way ANOVA followed by Bonferroni's post hoc test (O). \**P* < 0.05; \*\**P* < 0.01; \*\*\*\**P* < 0.0001; ns, not significant.

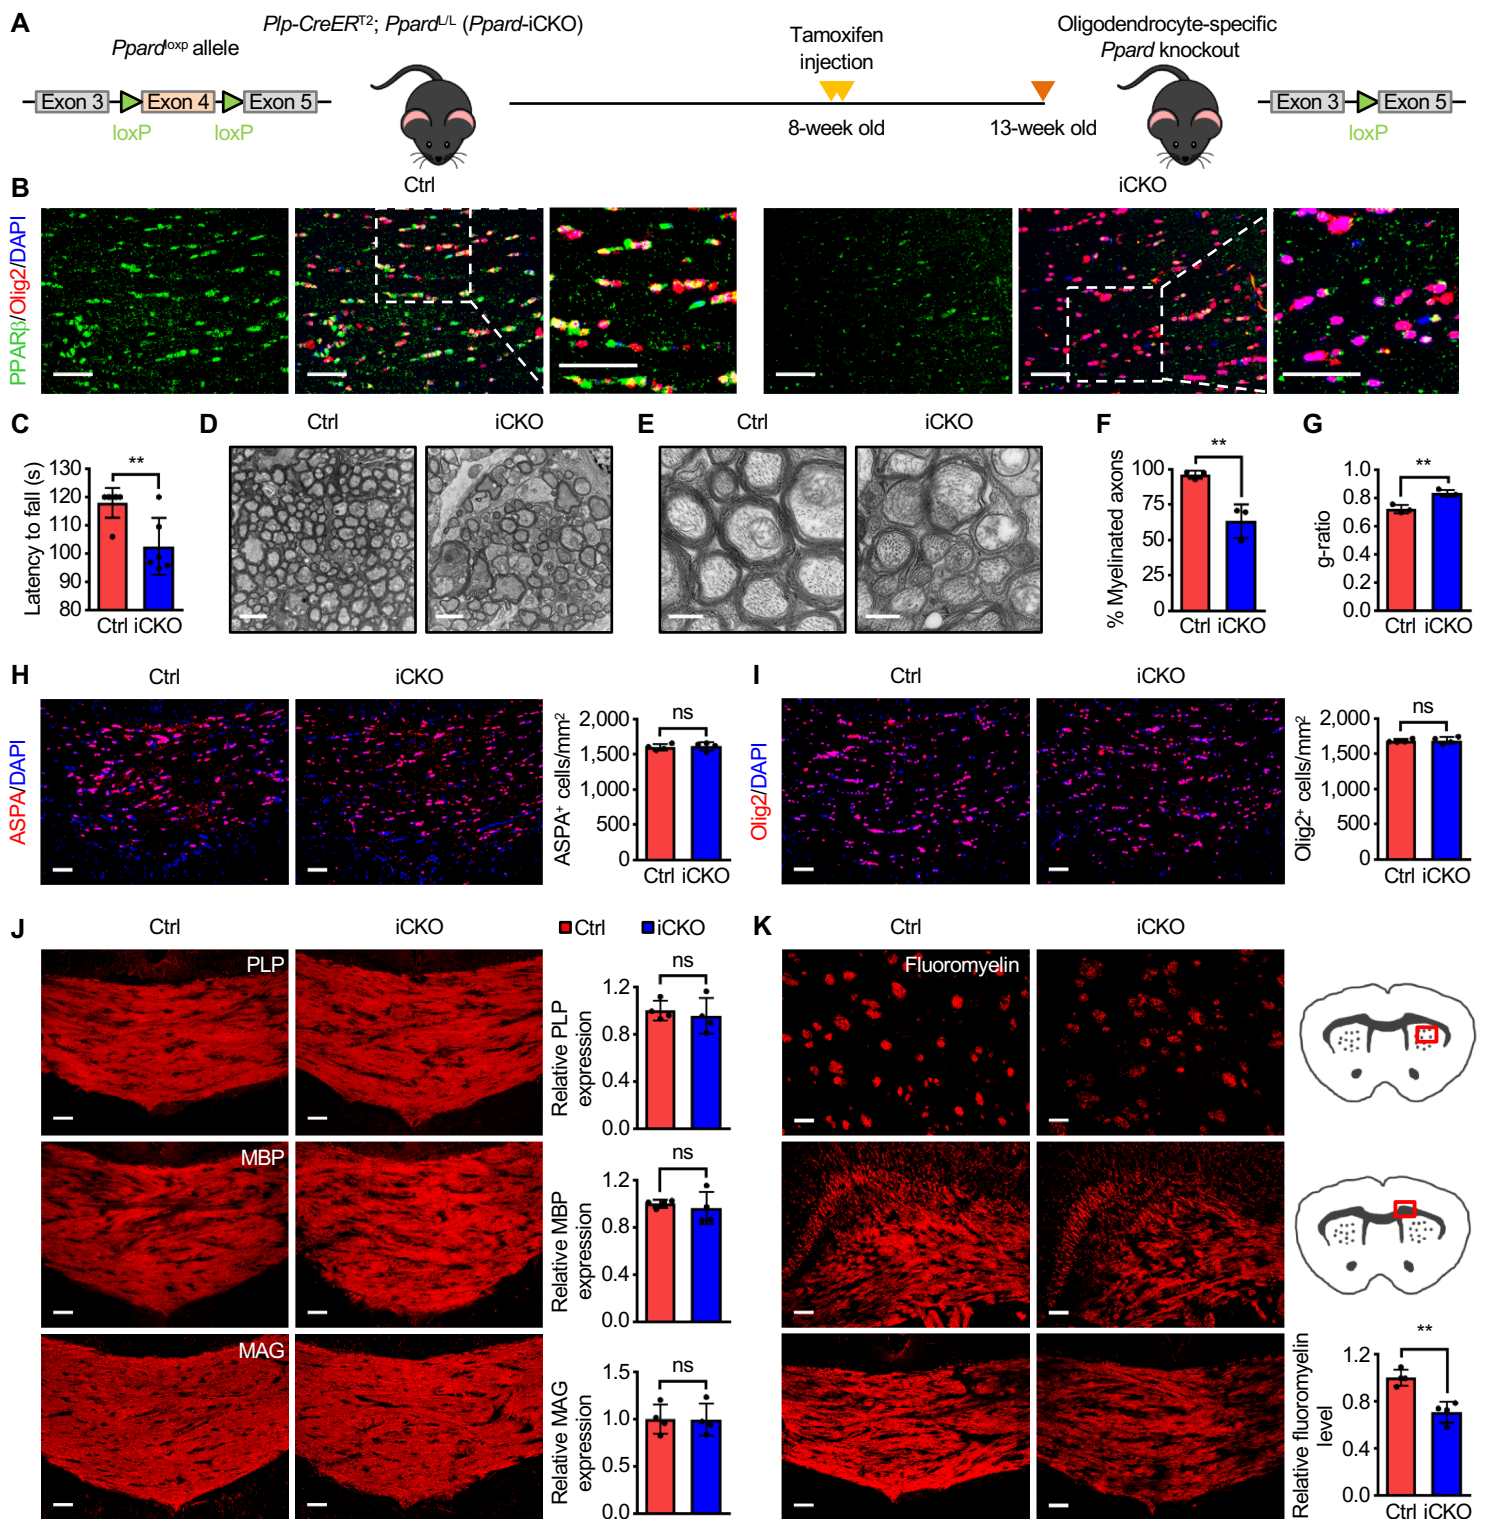

**Supplemental Figure 7. Ablation of *Ppard* in mature myelinating oligodendrocytes leads to demyelination with reduction in myelin lipids.** (A) Schema showing the *Ppard*<sup>Loxp</sup> allele and the generation of oligodendrocyte-specific *Ppard*-knockout mice. (B) Representative images of immunofluorescent staining of PPAR $\beta$ -Olig2 in the corpus callosum tissues of *Ppard*-iCKO mice and controls 5 weeks after tamoxifen injection.  $n = 4$  mice/group. Scale bars, 50  $\mu$ m. (C) Latency to fall (s) off the rotarod (20 r.p.m.) for *Ppard*-iCKO mice and controls 5 weeks after tamoxifen injection ( $n = 7$  mice in the control group,  $n = 6$  mice in the *Ppard*-iCKO group). (D-G) Representative electron micrographs and quantification of the optic nerves of *Ppard*-iCKO mice and control mice 5 weeks after tamoxifen injection ( $n = 3$  mice/group). Scale bars, 2  $\mu$ m (D); 500 nm (E). (H and I), Representative images and quantification of immunofluorescent staining of ASPA and Olig2 in the corpus callosum tissues of the experimental mice in B ( $n = 4$  mice/group). Scale bars, 50  $\mu$ m. (J) Representative images and quantification of immunofluorescent staining of PLP, MBP, and MAG in the corpus callosum tissues of the experimental mice in B ( $n = 4$  mice/group). Scale bars, 50  $\mu$ m. (K) Representative images and quantification of staining of FluoroMyelin in the experimental mice in B ( $n = 4$  mice/group). Images were taken from the regions of the red-boxed areas in the schema. Scale bars, 50  $\mu$ m. Data are mean  $\pm$  s.d.; student's  $t$  test. \*\* $P < 0.01$ ; ns, not significant.

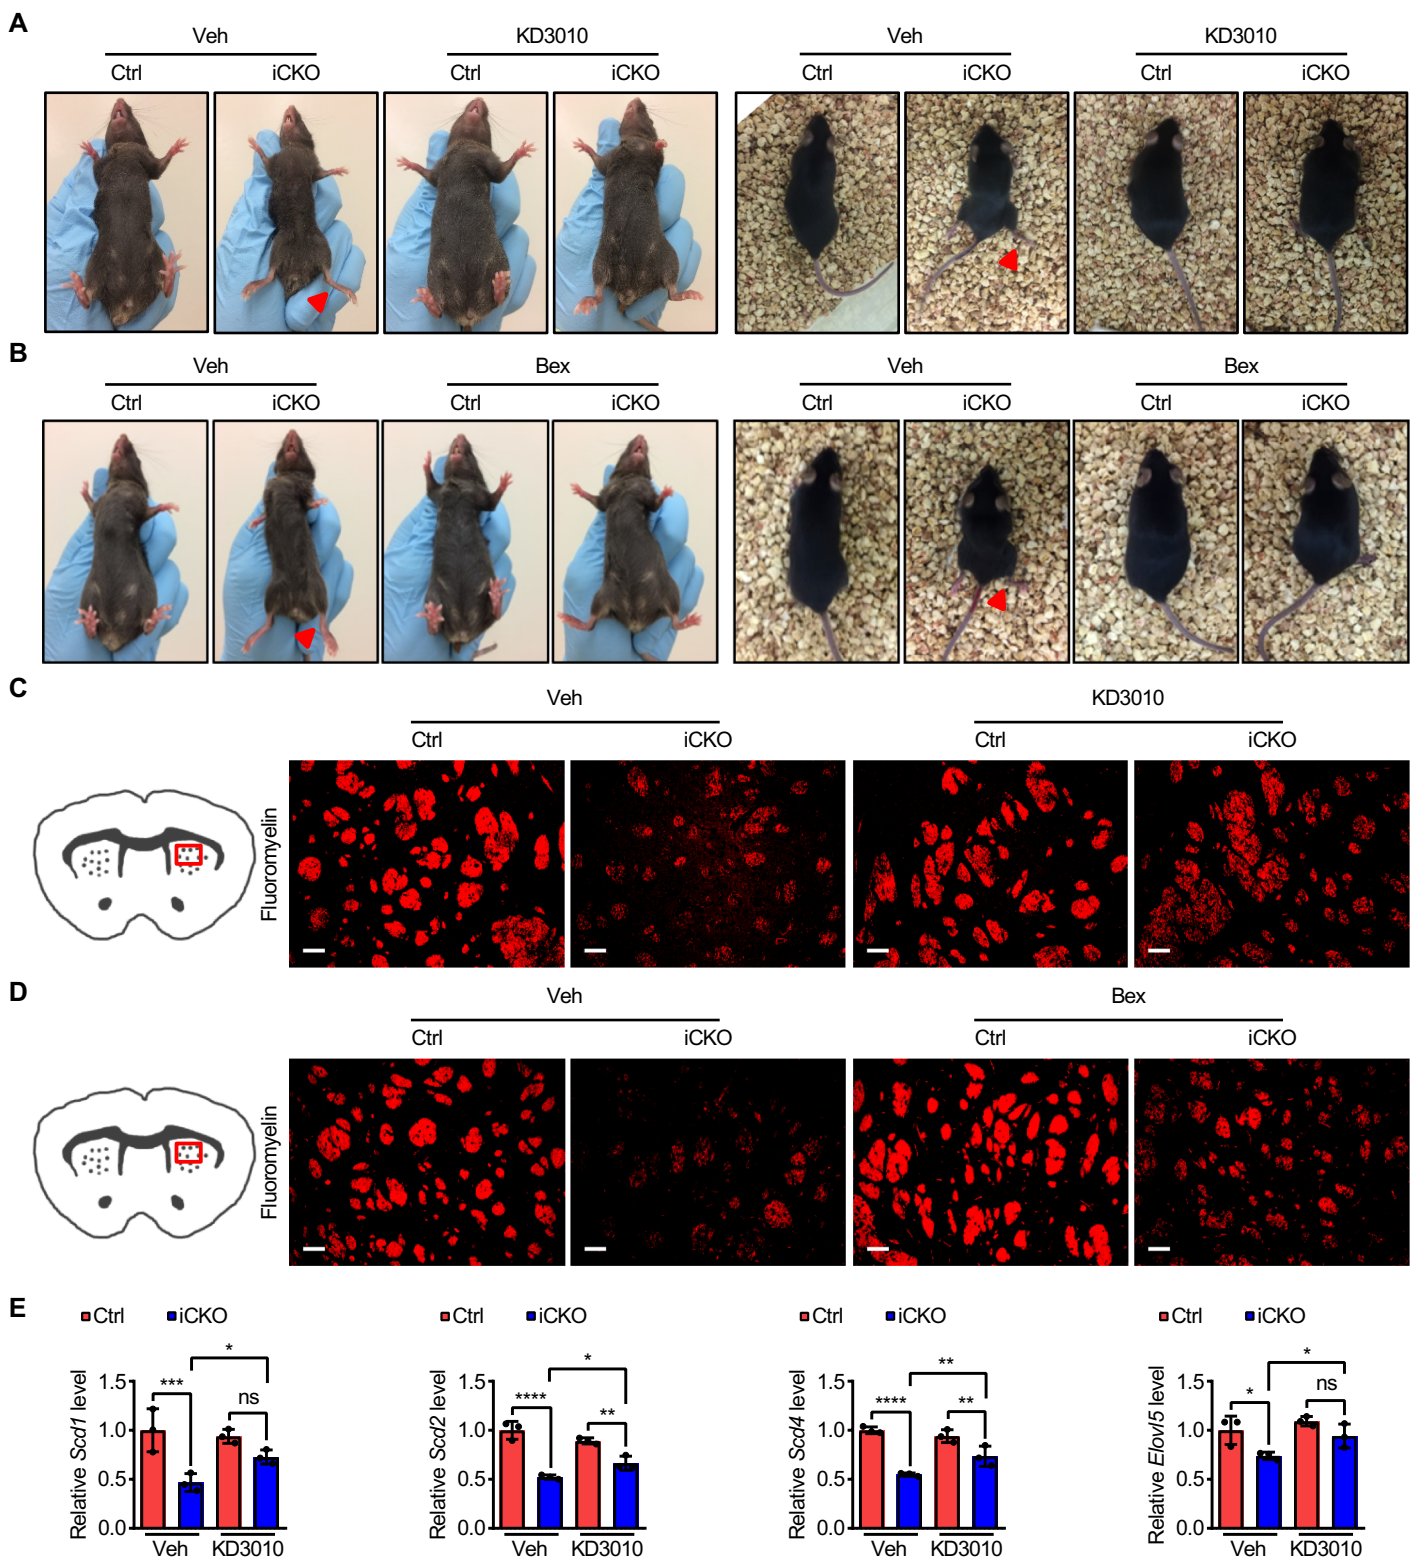

**Supplemental Figure 8. PPAR $\beta$  and RXR agonists alleviate *Qki* depletion-induced demyelination.** (A and B) Representative images showing severe abnormal hind limb weakness (second panel from the left, red arrow) and paresis (sixth panel from the left, red arrow) in *Qk*-iCKO mice receiving daily oral administration of KD3010, Bex, or Veh for 5 weeks after tamoxifen injection. (C and D) Representative images of staining of FluoroMyelin in the caudoputamen tissues of *Qk*-iCKO mice and controls receiving daily oral administration of KD3010, Bex, or Veh for 5 weeks after tamoxifen injection. Images were obtained from the regions of the red-boxed areas in the schema (left panel). Scale bars, 50  $\mu$ m. (E) Quantification of the expression level of genes involved in fatty acid metabolism in the corpus callosum tissues of *Qk*-iCKO mice and controls receiving KD3010 or Veh for 5 weeks after tamoxifen injection by RT-qPCR. Data are mean  $\pm$  s.d.; one-way ANOVA with Fisher's LSD test. \* $P < 0.05$ ; \*\* $P < 0.01$ ; \*\*\* $P < 0.001$ ; \*\*\*\* $P < 0.0001$ ; ns, not significant.



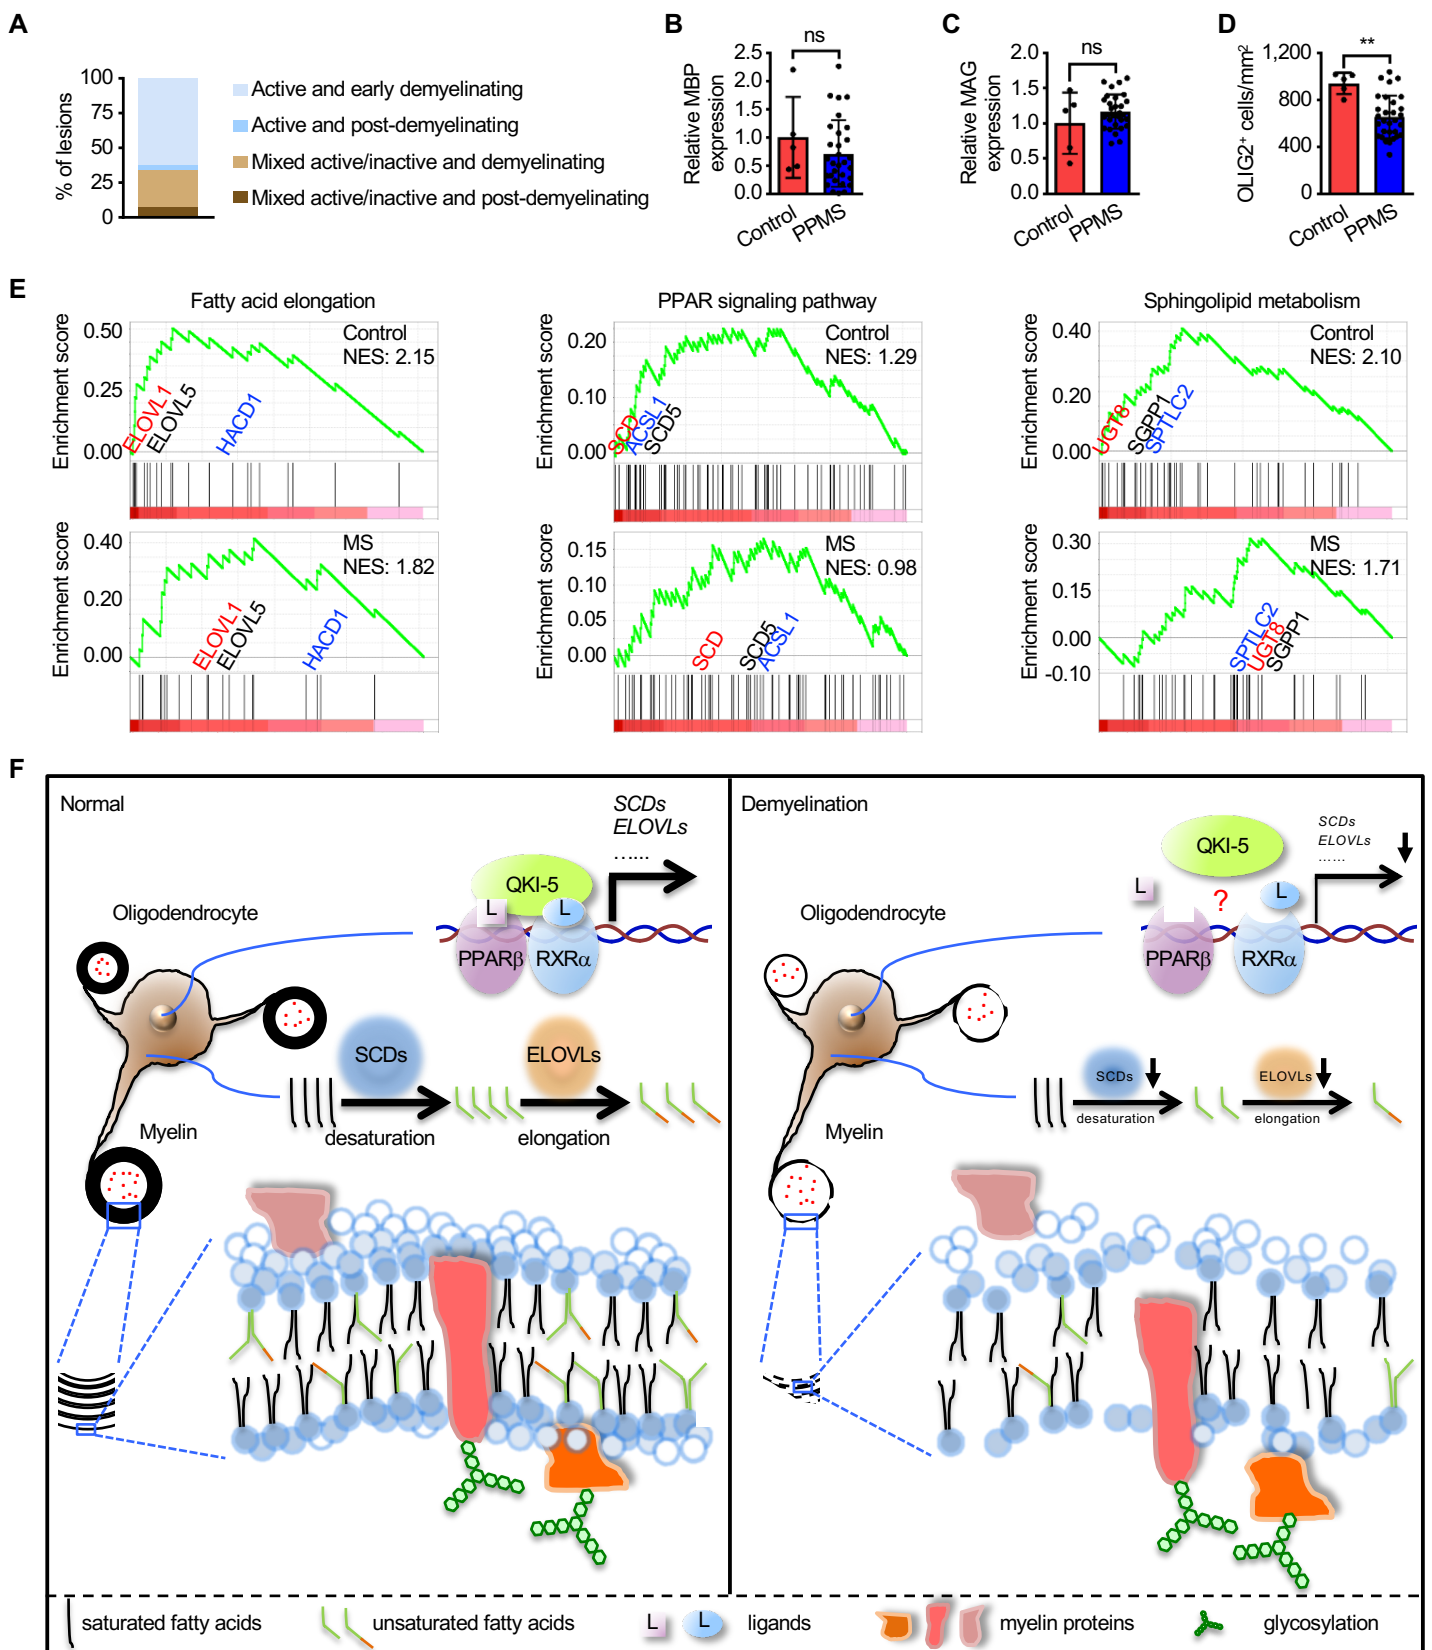

**Supplemental Figure 9. Myelin lipid metabolism is preferentially reduced in MS lesions.** (A) Percentage of MS lesions with different inflammatory and demyelinating activities. (B-D) Quantification of immunofluorescent staining of MBP (B), MAG (C), and OLIG2 (D) in the frontal lobes of 5 neurological disease-free human brains (control) and 30 lesions from 6 patients with PPMS. (E) Comparison of the GSEA signatures of lipid metabolism pathways between the MS lesions and the controls. (F) Schematic of the essential role of Qki-PPAR $\beta$ -RXR $\alpha$  complex-regulated fatty acid desaturation and elongation in mature myelin maintenance. Data are mean  $\pm$  s.d.; student's *t* test. \*\**P* < 0.01; ns, not significant.

**Supplemental Video 1. Severe abnormal hind limb weakness and paresis in *Qk*-iCKO mice.**

8-week-old *Qk*-iCKO mice and control mice were injected with tamoxifen and the severity of abnormal hind limb weakness and paresis of these animals was recorded 5 weeks after injection.

**Supplemental Video 2. High-fat diet alleviates *Qk*-depletion–induced neurological deficits.**

8-week-old tamoxifen-injected *Qk*-iCKO mice and control mice were fed either a normal diet (ND) or the high-fat diet (HFD). The severity of abnormal hind limb weakness and paresis of these animals was recorded 5 weeks after treatment.

**Supplemental Video 3. PPAR $\beta$  agonist alleviates *Qk*-depletion–induced neurological**

**deficits.** 8-week-old tamoxifen-injected *Qk*-iCKO mice and control mice were orally administered 50 mg/kg/day KD3010 or vehicle (Veh). The severity of abnormal hind limb weakness and paresis of these animals was recorded 5 weeks after treatment.

**Supplemental Video 4. RXR agonist alleviates *Qk*-depletion–induced neurological deficits.**

8-week-old tamoxifen-injected *Qk*-iCKO mice and control mice were orally administered 100 mg/kg/day bexarotene (Bex) or vehicle. The severity of abnormal hind limb weakness and paresis of these animals was recorded 5 weeks after treatment.

**Supplemental Table 1 (separate Excel file). Lipidomic analysis of the concentrations of lipids in the spinal cords of *Qk*-iCKO mice and control mice.** Tamoxifen was administered to 8-week-old *Qk*-iCKO mice and control mice (5 in each group), and their spinal cords were collected 5 weeks later for further lipidomic analysis.



**Supplemental Table 2 (separate Excel file). Lipidomic analysis of the compositions of lipids in the spinal cords of *Qk-iCKO* mice and control mice.** Tamoxifen was administered to 8-week-old *Qk-iCKO* mice and control mice (5 in each group), and their spinal cords were collected 5 weeks later for further lipidomic analysis.

**Supplemental Table 3. Human brain sample information.**

| RMMSC <sup>A</sup><br># | Tissue type                                 | Age at death | PMI <sup>B</sup> | Sex | Cause of death      | Disease duration                      | Disease-modifying therapies / immunomodulatory therapy |
|-------------------------|---------------------------------------------|--------------|------------------|-----|---------------------|---------------------------------------|--------------------------------------------------------|
| 408                     | Control                                     | 74           | 48 hours         | M   | unknown             | N/A                                   | N/A                                                    |
| 482                     | Control                                     | 46           | N/A              | F   | unknown             | N/A                                   | N/A                                                    |
| 487                     | Control                                     | 59           | 19 hours         | M   | unknown             | N/A                                   | N/A                                                    |
| 489                     | Control                                     | 73           | N/A              | F   | unknown             | N/A                                   | N/A                                                    |
| 503                     | Control                                     | 55           | N/A              | F   | unknown             | N/A                                   | N/A                                                    |
| 436                     | Primary progressive multiple sclerosis      | 60           | 10 hours         | M   | unknown             | unknown                               | unknown                                                |
| 438                     | Primary progressive multiple sclerosis      | 75           | 20 hours         | F   | unknown             | 36 years                              | none                                                   |
| 449                     | Primary slow progressive multiple sclerosis | 74           | 7 hours          | F   | unknown             | unknown                               | none                                                   |
| 495                     | Primary slow progressive multiple sclerosis | 78           | 20 hours         | F   | Respiratory failure | 33 years                              | none                                                   |
| 507                     | Primary progressive multiple sclerosis      | 69           | 0 hour           | F   | unknown             | 46 years                              | Natalizumab                                            |
| 534                     | Primary slow progressive multiple sclerosis | 71           | 43 hours         | F   | unknown             | symptoms 43 years; diagnosed 23 years | unknown                                                |

<sup>A</sup>Rocky Mountain Multiple Sclerosis Center

<sup>B</sup>postmortem interval

**Supplemental Table 3. Human brain sample information.** The patients' age at the time of death, sex, postmortem interval, pathological diagnosis, cause of death, disease duration, and disease-modifying therapies are shown.

**Supplemental Table 4. Primer sequences.**

| <b>Primer Name</b>     | <b>Primer sequence</b>   | <b>Comments</b> |
|------------------------|--------------------------|-----------------|
| <i>Scd1</i> -Forward   | CCTCTTCGGGATTTTCTACTACAT | RT-qPCR         |
| <i>Scd1</i> -Reverse   | TCCAGTTTTCCGCCCTTCTC     | RT-qPCR         |
| <i>Scd2</i> -Forward   | AAGATGATCTATATGACCCACCT  | RT-qPCR         |
| <i>Scd2</i> -Reverse   | CACGTCATTCTGGAACGCCA     | RT-qPCR         |
| <i>Scd4</i> -Forward   | TGTCTGACCTGAAAGCCGAG     | RT-qPCR         |
| <i>Scd4</i> -Reverse   | GTGGAAGCCCTCGCCTAAAG     | RT-qPCR         |
| <i>Fads1</i> -Forward  | GTGATCGACCGGAAGGTGTA     | RT-qPCR         |
| <i>Fads1</i> -Reverse  | AGCGCTTTATTCTTGGTGGGT    | RT-qPCR         |
| <i>Fads2</i> -Forward  | CATCGACCGCAAGGTCTACA     | RT-qPCR         |
| <i>Fads2</i> -Reverse  | TCTGAGAGCTTTTGCCACGG     | RT-qPCR         |
| <i>Elovl2</i> -Forward | TACCCTGGACAGCGCATCG      | RT-qPCR         |
| <i>Elovl2</i> -Reverse | AGAGGATGAGCTCCACCAGCA    | RT-qPCR         |
| <i>Elovl5</i> -Forward | ATGGAACATTTTCGATGCGTCA   | RT-qPCR         |
| <i>Elovl5</i> -Reverse | GTCCCAGCCATAACAATGAGTAAG | RT-qPCR         |
| <i>Acot1</i> -Forward  | ATACCCCCTGTGACTATCCTGA   | RT-qPCR         |
| <i>Acot1</i> -Reverse  | CAAACACTCACTACCCAACCTGT  | RT-qPCR         |
| <i>Acot2</i> -Forward  | CTCTTCCTGCCCCAGAACC      | RT-qPCR         |
| <i>Acot2</i> -Reverse  | CAGCCCAATTCCAGGTCCTT     | RT-qPCR         |
| <i>Acaa2</i> -Forward  | CTGCTACGAGGTGTGTTTCATC   | RT-qPCR         |
| <i>Acaa2</i> -Reverse  | AGCTCTGCATGACATTGCC      | RT-qPCR         |
| <i>Hadh</i> -Forward   | TCGTGAACCGACTCTTGGTG     | RT-qPCR         |
| <i>Hadh</i> -Reverse   | ATTTTCATGCCACCCGTCCTAA   | RT-qPCR         |
| <i>Hadha</i> -Forward  | TGCATTTGCCGCAGCTTTAC     | RT-qPCR         |
| <i>Hadha</i> -Reverse  | GTTGGCCCAGATTTTCGTTCA    | RT-qPCR         |
| <i>Hadhb</i> -Forward  | ACTACATCAAAATGGGCTCTCAG  | RT-qPCR         |
| <i>Hadhb</i> -Reverse  | AGCAGAAATGGAATGCGGACC    | RT-qPCR         |
| <i>Ppt1</i> -Forward   | ACCGCTGGTGATCTGGCAT      | RT-qPCR         |
| <i>Ppt1</i> -Reverse   | TCTCCACATCCTCCATCATGTTCT | RT-qPCR         |
| <i>Acadl</i> -Forward  | TCTTTTCTCGGAGCATGACA     | RT-qPCR         |
| <i>Acadl</i> -Reverse  | GACCTCTCTACTCACTTCTCCAG  | RT-qPCR         |
| <i>Acadm</i> -Forward  | AGGGTTTAGTTTTGAGTTGACGG  | RT-qPCR         |
| <i>Acadm</i> -Reverse  | CCCCGCTTTTGTTCATATTCCG   | RT-qPCR         |
| <i>Acsbg1</i> -Forward | ATGCCACGCGGTTCTGAAG      | RT-qPCR         |
| <i>Acsbg1</i> -Reverse | GAGCTGGTTTGCGAGTTGTCT    | RT-qPCR         |
| <i>Acox1</i> -Forward  | TAACTTCCTCACTCGAAGCCA    | RT-qPCR         |
| <i>Acox1</i> -Reverse  | AGTTCCATGACCCATCTCTGTC   | RT-qPCR         |
| <i>Cpt1a</i> -Forward  | CTCCGCCTGAGCCATGAAG      | RT-qPCR         |
| <i>Cpt1a</i> -Reverse  | CACCAGTGATGATGCCATTCT    | RT-qPCR         |
| <i>Cpt2</i> -Forward   | CAGCACAGCATCGTACCCA      | RT-qPCR         |
| <i>Cpt2</i> -Reverse   | TCCCAATGCCGTTCTCAAAAT    | RT-qPCR         |
| <i>Actb</i> -Forward   | CCACCATGTACCCAGGCATT     | RT-qPCR         |
| <i>Actb</i> -Reverse   | CCGATCCACACAGAGTACTT     | RT-qPCR         |

| <i>Continued</i>              |                        |           |
|-------------------------------|------------------------|-----------|
| mC- <i>Scd2</i> -Pmt-Forward  | ATGGAGTTGCAAGTGGTCGG   | ChIP-qPCR |
| mC- <i>Scd2</i> -Pmt-Reverse  | GCTTCAGCGCTTTCTCTGGA   | ChIP-qPCR |
| mC- <i>Cpt1c</i> -Pmt-Forward | CATCGAGGGATGCTGGTGAG   | ChIP-qPCR |
| mC- <i>Cpt1c</i> -Pmt-Reverse | GCGAGTAGGGCTTCTCCATC   | ChIP-qPCR |
| mC-NC-Forward                 | ATGCCTAACTTCCAGTTCCAGG | ChIP-qPCR |
| mC-NC-Reverse                 | AGCTTAGAGCAGAAAGCTGGT  | ChIP-qPCR |

**Supplemental Table 4. Primer sequences.** A complete list of the sequences of the primers used in this study is shown.

## Supplemental Methods

*RNA isolation and real-time qPCR.* RNA was extracted from the corpus callosum tissues of the mouse brains, freshly isolated mouse oligodendrocytes, NSCs, and differentiated oligodendrocytes using an RNeasy Mini Kit, according to the manufacturer's instructions (Qiagen). Two micrograms of RNA were reverse transcribed to cDNA using SuperScript III First-Strand Synthesis SuperMix (Thermo Fisher Scientific), and real-time qPCR was performed using iTaq Universal SYBR Green Supermix (Bio-rad) in an Applied Biosystems 7500 Fast Real-Time PCR system. The relative transcription levels of the genes of interest were normalized against *Actb* and calculated using the  $\Delta\Delta CT$  method. A complete list of the primer sequences used in this study can be found in Supplemental Table 4.

*GSEA in human tissue samples.* Raw gene expression profiling files were downloaded from the Gene Expression Omnibus under accession number GSE38010 (40). The latest version of custom CDF files (v22) (59, 60) was used to map probes from the Affymetrix Human Genome U133 Plus 2.0 Array to the Ensemble transcript database, resulting in robust multi-array average-normalized and log-transformed gene expression values (61). A single-sample GSEA was performed on the expression profiles of 4 cases (CAP1, CAP2, CP1, and CP2) and 2 controls (control 1 and control 2) for 8 pathways (fatty acid metabolism [KEGG: 01212], fatty acid biosynthesis [KEGG: 00061], biosynthesis of unsaturated fatty acids [KEGG: 01040], fatty acid elongation [KEGG: 00062], fatty acid degradation [KEGG: 00071], PPAR signaling pathway [KEGG: 03320], sphingolipid metabolism [KEGG: 00600], and glycerophospholipid metabolism [KEGG: 00564]). Normalized enrichment scores were calculated for representation and further



analyses. GSEA (v2.2.4) was used to generate the representative enrichment plots for pathways per sample (58).

*Genome-wide computational analysis for RNA motifs of Qki.* A computational screening of the mouse reference genome (mm10 version) with the QRE motif (UACUAAC) was performed on MotifMap (<http://motifmap.ics.uci.edu>) (62).

*Immunoprecipitation and immunoblotting.* Differentiated oligodendrocytes were crosslinked by 1% formaldehyde for 10 minutes and lysed in NP-40 buffer (50 mM Tris-HCl [pH 7.5], 150 mM NaCl, 5 mM EDTA, and 0.3% NP-40) for 30 minutes at 4°C. The whole-cell lysate was sheared using a Bioruptor Pico sonication device (Diagenode) for 30 cycles (30 seconds on, 30 seconds off) and centrifuged at 13,000 g at 4°C for 15 minutes. The supernatant was incubated with antibodies against Qki-5 (immunizing rabbit with a short synthetic peptide [CGAVATKVRRHDMRVHPYQRIVTADRAATGN]), HA (ab18181; Abcam), PPAR $\beta$  (PA1-823A; Thermo Fisher Scientific), or normal immunoglobulin G overnight at 4°C. Magnetic beads with recombinant protein G (Thermo Fisher Scientific) were added to the immunoprecipitation system for another 2 hours at 4°C. The immunoprecipitates were washed extensively with NP-40 buffer 3 times, and the bound proteins were boiled with SDS-PAGE sample buffer at 95°C for 20 minutes before further immunoblotting.

Brain tissues were homogenized in NP-40 buffer and lysed in the same manner as described above. Protein concentrations were measured using a DC protein assay (Bio-rad). We then subjected 20 to 40  $\mu$ g of protein to a standard immunoblotting protocol. The following antibodies were used according to their manufacturer's directions: anti-PLP (ab105784), anti-

PPAR $\alpha$  (ab24509), and anti-HA (ab18181) were from Abcam; anti-PPAR $\gamma$  (#2435), anti-RXR $\alpha$  (#3085), and anti-Lamin B2 (#13823) were from Cell Signaling Technology; anti-MOG (sc-73330) and anti-histone H2A (sc-10807) were from Santa Cruz Biotechnology; anti-PPAR $\beta$  (PA1-823A) was from Thermo Fisher Scientific; anti-RXR $\beta$  (NBP1-30897) was from Novus Biologicals; RXR $\gamma$  (CPA2042) was from Cohesion Biosciences; anti-MBP (SMI-94R) was from Covance; anti-Qki-5 (IHC-00574) was from Bethyl Laboratories; and anti- $\beta$ -actin (A5441) was from Sigma-Aldrich.

*RNase A treatment.* The differentiated oligodendrocytes were washed once with PBS, washed again with ASE buffer (20 mM Tris-HCl [pH 7.5], 0.5 mM EGTA, and 5 mM MgCl<sub>2</sub>), and permeabilized with ASE buffer containing 0.1% Triton X-100 at room temperature for 5 minutes. The cells were treated with 100  $\mu$ g/mL RNase A (DNase- and protease-free; Thermo Fisher Scientific) at room temperature for 20 minutes to digest RNA in the living cells (63). Cells were washed with PBS and subjected to crosslinking, sonication, and co-IP experiments, as described above. Alternatively, the differentiated oligodendrocytes were lysed in NP-40 buffer at 4°C for 30 minutes, followed by digestion with 100  $\mu$ g/mL RNase A at room temperature for 20 minutes. The cell lysates were then used for co-IP.

*ChIP-seq and ChIP-qPCR.* ChIP assays were carried out as described previously (64). The sheared chromatin from differentiated oligodendrocytes with ectopic expression of HA-PPAR $\beta$  (with lentiviral plasmid pInducer20) or freshly isolated mouse oligodendrocytes was incubated with anti-Qki-5 (immunizing rabbit with a short synthetic peptide [CGAVATKVRRHDMRVHPYQRIVTADRAATGN]), anti-PPAR $\beta$  (PA1-823A; Thermo Fisher

Scientific), anti-HA (#3724S; Cell Signaling Technology), or anti-Pol II (ab817; Abcam) antibodies in High Salt Buffer (50 mM HEPES-NaOH [pH 7.5], 300 mM NaCl, 1 mM EDTA, 1% Triton, 0.1% SDS, and 0.1% sodium deoxycholate with freshly added protease inhibitor) overnight at 4°C. The protein-DNA complexes were immobilized on prewashed protein A/G agarose beads (Smart-lifesciences). After several washes, the bound fractions were eluted and reverse crosslinked in the elution buffer (50 mM Tris-HCl [pH 8.0], 10 mM EDTA, and 1% SDS) and digested with RNase A and proteinase K at 65°C for 4 hours, DNA samples were then purified using a PCR purification kit (Qiagen). Libraries were generated by VAHTS Universal DNA Library Prep Kit (Vazyme) and sequenced by Illumina HiSeq X Ten or NovaSeq 6000 (Jiangxi Haplox Clinical Lab Cen, Ltd). The FASTQ data were trimmed by trim\_galore (v0.4.4\_dev) and mapped to the mouse genome (mm10 version) using bowtie (v1.2.2) (65), then peaks were identified by homer (v4.10.1) (66) with the following steps: makeTagDirectory and findPeaks Sample\_tag -style factor -size auto -minDist default -i Input\_tag -fdr 0.001. The top 1,000 peaks of PPAR $\beta$  and HA from differentiated oligodendrocytes and the top 300 peaks of PPAR $\beta$  from freshly isolated mouse oligodendrocytes were used for motif search. Motif was called by homer with findMotifsGenome.pl -size 300 -len 14,15,16 -mis 3. Signal plots and Heatmaps were generated with ngsplot (67). ChIP-qPCR was performed using iTaq Universal SYBR Green Supermix, as described above. A complete list of the sequences of the primers used in this study can be found in Supplemental Table 4.

## References

59. Dai M, et al. Evolving gene/transcript definitions significantly alter the interpretation of GeneChip data. *Nucleic Acids Res.* 2005;33(20):e175.

60. Sandberg R, Larsson O. Improved precision and accuracy for microarrays using updated probe set definitions. *BMC bioinformatics*. 2007;8(1):48.
61. Bengtsson H, Ray A, Spellman P, Speed TP. A single-sample method for normalizing and combining full-resolution copy numbers from multiple platforms, labs and analysis methods. *Bioinformatics*. 2009;25(7):861-867.
62. Liu Y, Sun S, Bredy T, Wood M, Spitale RC, Baldi P. MotifMap-RNA: a genome-wide map of RBP binding sites. *Bioinformatics*. 2017;33(13):2029-2031.
63. Chamousset D, et al. RRP1B targets PP1 to mammalian cell nucleoli and is associated with Pre-60S ribosomal subunits. *Mol Biol Cell*. 2010;21(23):4212-4226.
64. Lan F, et al. A histone H3 lysine 27 demethylase regulates animal posterior development. *Nature*. 2007;449(7163):689-694.
65. Langmead B, Trapnell C, Pop M, Salzberg SL. Ultrafast and memory-efficient alignment of short DNA sequences to the human genome. *Genome Biol*. 2009;10(3):R25.
66. Heinz S, et al. Simple combinations of lineage-determining transcription factors prime cis-regulatory elements required for macrophage and B cell identities. *Mol Cell*. 2010;38(4):576-589.
67. Shen L, Shao N, Liu X, Nestler E. ngs.plot: Quick mining and visualization of next-generation sequencing data by integrating genomic databases. *BMC Genomics*. 2014;15:284.
